## References

1. Joosten A, Alexander B, Legrand M, Duranteau J: Goal-directed therapy and postcystectomy ileus: Comment. *ANESTHESIOLOGY* 2021; 134:813–5
2. Wuethrich PY, Studer UE, Burkhard FC: Goal-directed therapy and postcystectomy ileus: Comment. *ANESTHESIOLOGY* 2021; 134:815–6
3. Arslan-Carlon V, Tan KS, Dalbagni G, Pedoto AC, Herr HW, Bochner BH, Cha EK, Donahue TF, Fischer M, Donat SM: Goal-directed versus standard fluid therapy to decrease ileus after open radical cystectomy: A prospective randomized controlled trial. *ANESTHESIOLOGY* 2020; 133: 293–303
4. Shabsigh A, Korets R, Vora KC, Brooks CM, Cronin AM, Savage C, Raj G, Bochner BH, Dalbagni G, Herr HW, Donat SM: Defining early morbidity of radical cystectomy for patients with bladder cancer using a standardized reporting methodology. *Eur Urol* 2009; 55:164–74
5. Wuethrich PY, Burkhard FC, Thalmann GN, Stueber F, Studer UE: Restrictive deferred hydration combined with preemptive norepinephrine infusion during radical cystectomy reduces postoperative complications and hospitalization time: A randomized clinical trial. *ANESTHESIOLOGY* 2014; 120:365–77

(Accepted for publication January 7, 2021. Published online first on February 11, 2021.)

## Using the Tubing Clamp to Prevent the Dislodgement of a Double Lumen Endotracheal Tube: Comment

To the Editor:

In the recent article from Hargrave *et al.*,<sup>1</sup> their figure 1 illustrates how a clamp is commonly applied to a double lumen endotracheal tube. The authors state: “Supporting the antiviral filter prevents dislodgement of the double lumen tube or bronchial blocker.”<sup>1</sup> Although supporting the antiviral filter may help prevent dislodgement of the double lumen endotracheal tube, the weight of the tubing clamp as illustrated may be a factor in dislodging the double lumen

endotracheal tube. Also, if the airway gradually narrows as one moves deeper into the bronchial system, the inflation of the bronchial cuff would tend to create a force that works to push the double lumen endotracheal tube out.

An alternative technique is to apply the clamp so that the finger rings are directed downward and toward the patient. A drape clamp can be used to secure the finger ring portion of the clamp to either the bed sheet or the head support. This can create a dislodgement stop and/or a small vector force directed to pushing the double lumen endotracheal tube inward. It is doubtful this force will contribute significantly to the pressure exerted by the bronchial balloon on the airway mucosa, particularly if the bronchial balloon is reinflated after applying and securing the clamp. Anecdotally, since using this technique, I have not experienced a double lumen endotracheal tube dislodgement.

### Competing Interests

The author declares no competing interests.

Jonathan V. Roth, M.D. Albert Einstein Medical Center,  
Philadelphia, Pennsylvania. jvroth1@aol.com

DOI: 10.1097/ALN.0000000000003723

### Reference

1. Hargrave JM, Diehl RA, Holler KL, Gohar MAE: Adaptation allowing for bronchial blocker proximal port filtration during lung isolation for patients with airborne precautions. *ANESTHESIOLOGY* 2020; 133:1118–9

(Accepted for publication January 22, 2021. Published online first on February 16, 2021.)

This letter was sent to the author of the original article referenced above, who declined to respond.—Evan D. Kharasch, M.D., Ph.D., Editor-in-Chief

## Cryoneurolysis and Peripheral Nerve Stimulation: Comment

To the Editor:

We read the excellent review “Cryoneurolysis and Percutaneous Peripheral Nerve Stimulation to
